# Supplementary material for: Specific cancer-associated mutations in the switch III region of Ras increase tumorigenicity by nanocluster augmentation
Source: eLife journal article supplement (doi:10.7554/elife.08905), 2015-08-14

**A**SOS-catalyzed  $\text{Eu}^{3+}$ -GTP association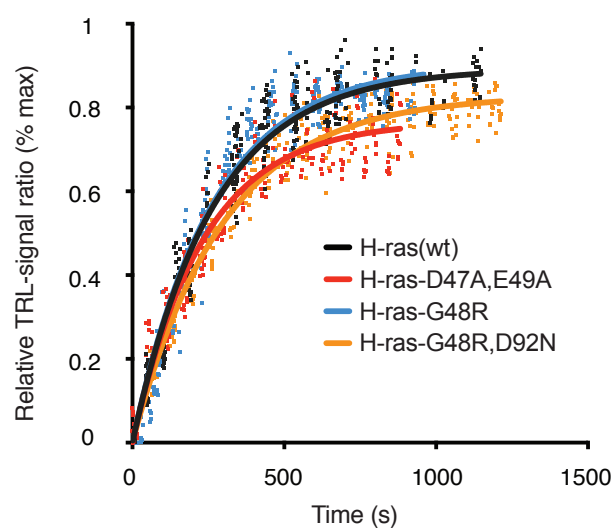**B**SOS-catalyzed  $\text{Eu}^{3+}$ -GTP dissociation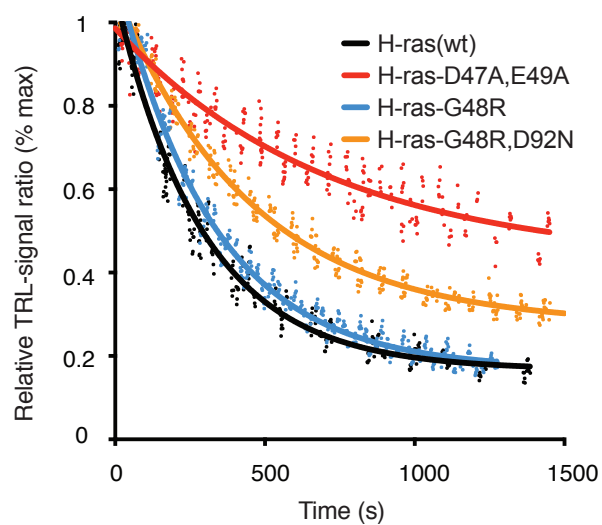**C**Binding of mantGTP $\gamma$ S to H-ras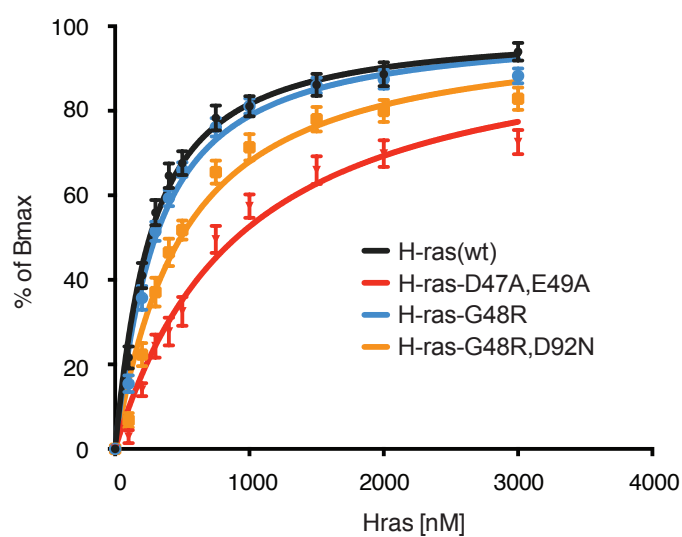

Supplement: supp [file elife_poa_e08905_Figure_2_figure_supplement_2.pdf › elife_poa_e08905_Figure_2_figure_supplement_2.pdf]
