# Supplementary material for: Specific cancer-associated mutations in the switch III region of Ras increase tumorigenicity by nanocluster augmentation
Source: eLife. 2015 Aug 14;4:e08905. doi: 10.7554/eLife.08905 (PMC4563131; doi:10.7554/eLife.08905)
Supplement: Supplementary file 2. — Distribution of isoform specific coding mutations in the switch III region by cancer tissue type. Table details the frequency of amino acid changes due to coding mutations observed in switch III region of each isoform in different tissue types of cancer. Point mutations leading to different amino acid residue changes at the same coding position have been added to indicate the number of changes at that position. Summary for total mutations observed in all isoforms and total mutations per isoform have also been provided. Gray highlighted cells are the tissue types and switch III regions having the highest number of coding mutations at that position. Red and bold highlighted numbers indicate coding mutations observed in patient samples with the corresponding cancer tissue type. DOI: http://dx.doi.org/10.7554/eLife.08905.018 [file elife08905s002.xlsx]

## Sheet: Sheet1
			β2-β3-loop									α4-helix										α5-helix										HVR
			D40-	V45-	G48-	E49-	T50-	C51-	R51-	D54-		R123-	R128-	A130-	H131-	E132-	L133-	A134-	R135-	G138-		D153-	E153-	D154-	A155-	F156-	T158-	V160-	E162-	R164-		P167-	M168-	I171-	L171-	D173-	P174-	D175-	K176-	C185-	P185-	C186-	M188-	Total by cancer
	Paralog	Tissue type
	HRAS	Breast	0	0	0	0	0	0	0	0		0	1	0	0	0	0	0	0	0		0	0	0	0	0	0	0	1	0		0	0	0	0	0	0	0	0	0	0	0	0	2
	HRAS	Colorectal	0	0	0	0	0	0	0	0		0	0	0	0	0	0	0	1	0		0	0	0	0	0	0	0	1	0		1	0	0	0	0	0	0	0	0	0	0	0	3
	HRAS	Endometrium	0	0	0	0	0	0	0	0		1	0	0	0	0	0	0	0	0		0	0	0	0	0	0	0	0	0		0	0	0	0	0	0	0	0	0	0	0	0	1
	HRAS	Hematopoietic and Lymphoid	0	0	0	0	0	0	0	0		1	0	0	0	0	0	2	0	0		0	0	0	0	0	0	0	0	0		0	0	0	0	0	0	0	0	0	0	0	0	3
	HRAS	Head and Neck	0	0	0	0	0	0	0	0		0	0	0	0	0	0	0	0	0		0	0	0	0	0	0	0	0	0		0	0	0	0	0	0	0	0	0	0	0	0	0
	HRAS	Kidney	0	0	0	0	0	0	0	0		0	0	0	0	0	0	0	0	0		0	0	0	0	0	0	0	0	0		0	0	0	0	0	0	0	0	0	0	0	0	0
	HRAS	Liver	0	0	0	0	0	0	0	0		0	0	0	0	0	0	0	0	0		0	0	0	0	0	0	0	0	0		0	0	0	0	0	0	0	0	0	0	0	0	0
	HRAS	Lung	0	0	0	0	0	0	0	0		0	1	0	0	0	0	0	0	0		0	0	0	0	0	0	0	0	0		0	0	0	0	0	0	0	0	0	0	0	0	1
	HRAS	Pancreas	0	0	0	0	0	0	0	0		0	0	0	0	0	0	1	0	0		0	0	0	0	0	0	0	0	0		0	0	0	0	0	0	0	0	0	0	0	0	1
	HRAS	Prostrate	0	0	0	0	0	0	0	0		0	0	0	0	0	0	0	0	0		0	0	0	0	0	0	0	0	0		1	0	0	0	0	0	0	0	0	0	0	0	1
	HRAS	Skin	0	0	1	0	0	0	0	0		0	0	0	0	0	0	0	0	0		0	0	0	0	0	0	0	0	0		0	0	0	0	0	0	0	0	0	0	0	0	1
	HRAS	Soft tissue	0	0	0	0	0	0	0	0		0	0	0	0	0	0	0	0	0		0	0	0	0	0	0	0	0	0		0	0	0	0	0	1	0	0	0	0	0	0	1
	HRAS	Stomach	0	0	0	0	0	0	0	0		0	0	0	0	0	0	0	0	0		0	0	0	0	0	0	0	0	0		0	0	0	0	0	0	0	0	0	0	0	0	0
	HRAS	Upper Aerodigestive tract	0	0	0	0	0	0	0	0		0	0	0	0	0	1	0	0	0		0	0	0	0	0	0	0	0	0		0	0	0	0	0	0	0	0	0	0	0	0	1
	HRAS	Urinary tract	0	0	0	0	0	0	0	0		0	0	0	0	0	0	0	0	0		0	0	0	0	0	0	0	0	0		0	0	0	0	0	0	0	0	0	0	0	0	0
		Total per paralog																																										15
	NRAS	Breast	0	0	0	0	0	0	0	0		0	0	0	0	0	0	0	0	0		0	0	0	0	0	0	0	0	0		0	0	0	0	0	0	1	0	0	0	0	0	1
	NRAS	Colorectal	0	0	0	1	0	0	0	0		0	0	0	0	2	0	0	0	0		0	0	0	0	0	0	0	0	1		0	0	0	1	0	0	0	0	0	0	0	0	5
	NRAS	Endometrium	0	0	0	0	0	0	0	0		0	0	1	0	0	0	0	0	0		0	0	0	0	0	0	0	0	0		0	0	0	0	0	0	0	0	0	0	0	0	1
	NRAS	Hematopoietic and Lymphoid	0	1	0	0	0	1	0	0		0	0	0	0	0	0	0	0	0		0	0	0	0	0	0	0	0	0		0	0	0	0	0	0	0	0	0	1	0	0	3
	NRAS	Head and Neck	0	0	0	0	0	0	0	1		0	0	0	0	0	0	0	0	0		0	0	0	0	0	0	0	0	0		0	0	0	0	0	0	0	0	0	0	0	0	1
	NRAS	Kidney	0	0	0	0	0	0	0	0		0	0	0	0	0	0	0	0	0		0	0	0	0	0	0	0	0	0		0	0	0	0	0	0	0	0	0	0	0	0	0
	NRAS	Liver	0	0	0	0	0	0	0	0		0	0	0	0	0	0	0	0	0		0	0	0	0	0	0	0	0	0		0	1	0	0	0	0	0	0	0	0	0	0	1
	NRAS	Lung	0	0	0	0	0	0	0	0		0	0	0	0	0	0	0	0	0		0	0	0	0	0	0	0	0	0		0	0	0	0	0	0	0	0	0	0	1	0	1
	NRAS	Pancreas	0	0	0	0	0	0	0	0		0	0	0	0	0	0	0	0	0		0	0	0	0	0	0	0	0	0		0	0	0	0	0	0	0	0	0	0	0	0	0
	NRAS	Prostrate	0	0	0	0	0	0	0	0		0	0	0	0	0	0	0	0	0		0	0	0	0	0	0	0	0	0		0	0	0	0	0	0	0	0	0	0	0	0	0
	NRAS	Skin	0	0	0	1	2	0	0	0		0	0	0	1	0	0	0	0	0		0	1	0	0	0	0	0	0	0		0	0	0	0	0	0	0	0	0	0	0	0	5
	NRAS	Soft tissue	0	0	0	0	0	0	0	0		0	0	0	0	0	0	0	0	0		0	0	0	0	0	0	0	0	0		0	0	0	0	0	0	0	0	0	0	0	0	0
	NRAS	Stomach	0	0	0	0	0	0	0	0		0	0	0	0	0	0	0	0	0		0	0	1	0	0	0	0	0	0		0	0	0	0	0	0	0	0	0	0	0	0	1
	NRAS	Upper Aerodigestive tract	0	0	0	0	0	0	0	0		0	0	0	0	0	0	0	0	0		0	0	0	0	0	0	0	0	0		0	0	0	0	0	0	0	0	0	0	0	0	0
	NRAS	Urinary tract	0	0	0	0	0	0	0	0		0	0	0	1	0	0	0	0	0		0	0	0	0	0	0	0	0	0		0	0	0	0	0	0	0	0	0	0	0	0	1
		Total per paralog																																										20
	KRAS	Breast	0	0	0	0	0	0	0	0		0	0	0	0	0	0	0	0	0		0	0	0	0	0	0	0	0	0		0	0	0	0	0	0	0	0	0	0	0	0	0
	KRAS	Colorectal	0	1	0	2	0	0	1	0		0	0	0	0	0	0	0	0	0		0	0	0	1	0	0	0	0	5		0	0	0	0	1	0	0	0	0	0	0	0	11
	KRAS	Endometrium	1	0	0	0	0	0	0	0		0	0	0	0	0	0	0	0	0		1	0	0	0	0	0	1	0	1		0	0	0	0	0	0	0	1	0	0	0	0	5
	KRAS	Hematopoietic and Lymphoid	0	0	0	0	0	0	0	0		0	0	0	0	0	0	0	0	0		0	0	0	0	1	0	0	0	0		0	0	1	0	1	0	0	0	0	0	0	0	3
	KRAS	Head and Neck	0	0	0	0	0	0	0	0		0	0	0	0	0	0	0	0	0		0	0	0	0	0	1	0	0	0		0	0	0	0	1	0	0	0	0	0	0	0	2
	KRAS	Kidney	0	0	0	0	0	0	0	0		0	0	0	0	0	0	0	0	0		1	0	0	0	0	0	0	0	0		0	0	0	0	0	0	0	0	0	0	0	0	1
	KRAS	Liver	0	0	0	0	0	0	0	0		0	0	0	0	0	0	0	0	0		0	0	0	0	0	0	0	0	0		0	0	0	0	0	0	0	0	0	0	0	0	0
	KRAS	Lung	0	0	0	0	0	0	0	0		0	0	0	0	0	0	0	0	0		0	0	0	0	0	0	0	0	0		0	0	0	0	0	0	0	0	1	0	0	0	1
	KRAS	Pancreas	0	0	0	0	0	0	0	0		0	0	0	0	0	0	0	0	0		0	0	0	0	0	0	0	0	0		0	0	0	0	0	0	0	0	0	0	0	1	1
	KRAS	Prostrate	0	0	0	0	0	0	0	0		0	0	0	0	0	0	0	0	0		0	0	0	0	0	0	0	0	0		0	0	0	0	0	0	0	0	0	0	0	0	0
	KRAS	Skin	0	0	0	0	0	0	0	0		0	0	0	0	0	0	0	0	0		0	0	0	0	1	0	0	0	0		0	0	0	0	0	0	0	0	0	0	0	0	1
	KRAS	Soft tissue	0	0	0	0	0	0	0	0		0	0	0	0	0	0	0	0	0		0	0	0	0	0	0	0	0	0		0	0	0	0	0	0	0	0	0	0	0	0	0
	KRAS	Stomach	0	0	0	0	0	0	0	0		0	0	0	0	0	0	0	1	0		0	0	0	0	0	0	0	0	0		0	0	0	0	0	0	0	0	0	0	0	0	1
	KRAS	Upper Aerodigestive tract	0	0	0	0	0	0	0	0		0	0	0	0	0	0	0	0	1		0	0	0	0	0	0	0	0	0		0	0	0	0	0	0	0	0	1	0	0	0	2
	KRAS	Urinary tract	0	0	0	0	0	0	0	0		0	0	0	0	0	0	0	0	0		0	0	0	0	0	0	0	0	0		0	0	0	0	0	0	0	0	0	0	0	0	0
		Total per paralog																																										28
		Total by mutation	1	2	1	4	2	1	1	1		2	2	1	2	2	1	3	2	1		2	1	1	1	2	1	1	2	7		2	1	1	1	3	1	1	1	2	1	1	1	63
