# Supplementary figures and images for: Specific cancer-associated mutations in the switch III region of Ras increase tumorigenicity by nanocluster augmentation
Source: eLife journal article supplement (doi:10.7554/elife.08905), 2015-08-14

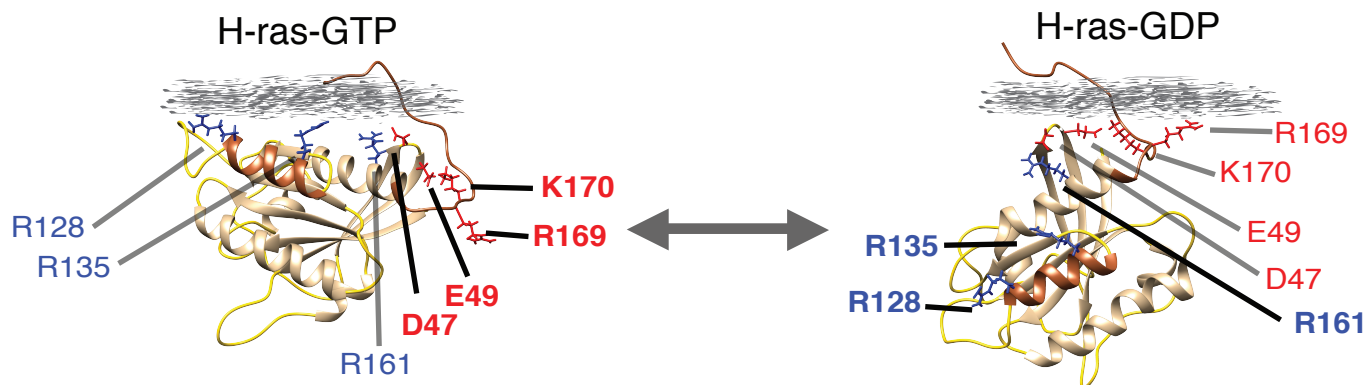

Supplement: supp [file elife_poa_e08905_Figure_1_figure_supplement_1.pdf › elife_poa_e08905_Figure_1_figure_supplement_1.pdf]

**A**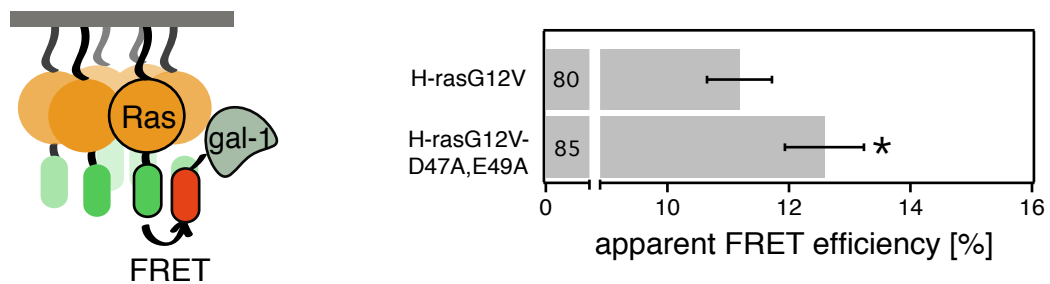**B**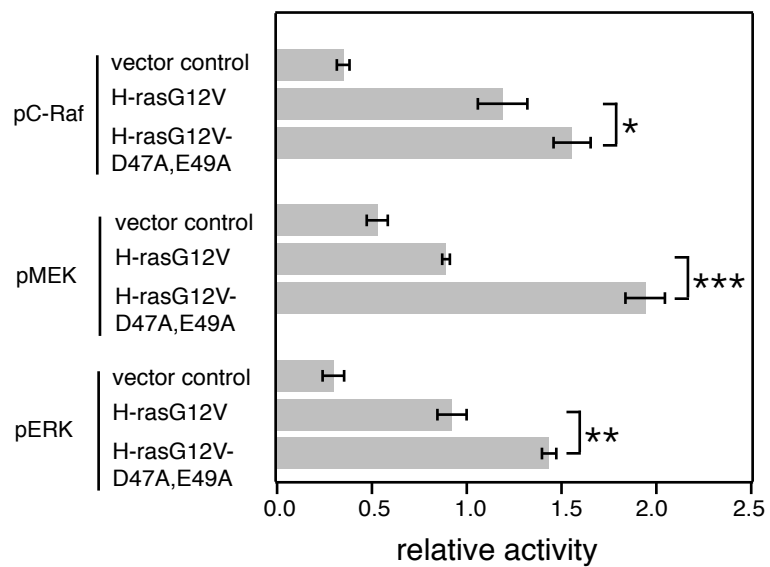**C**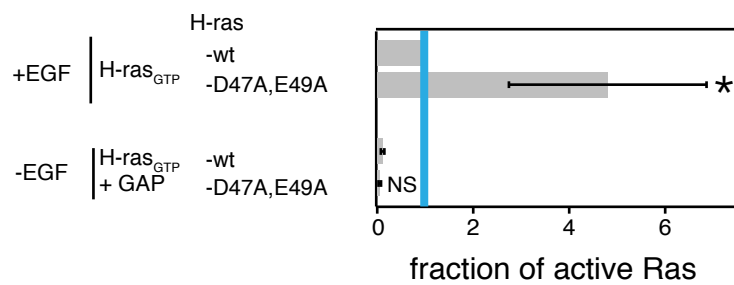

Supplement: supp [file elife_poa_e08905_Figure_2_figure_supplement_1.pdf › elife_poa_e08905_Figure_2_figure_supplement_1.pdf]

A

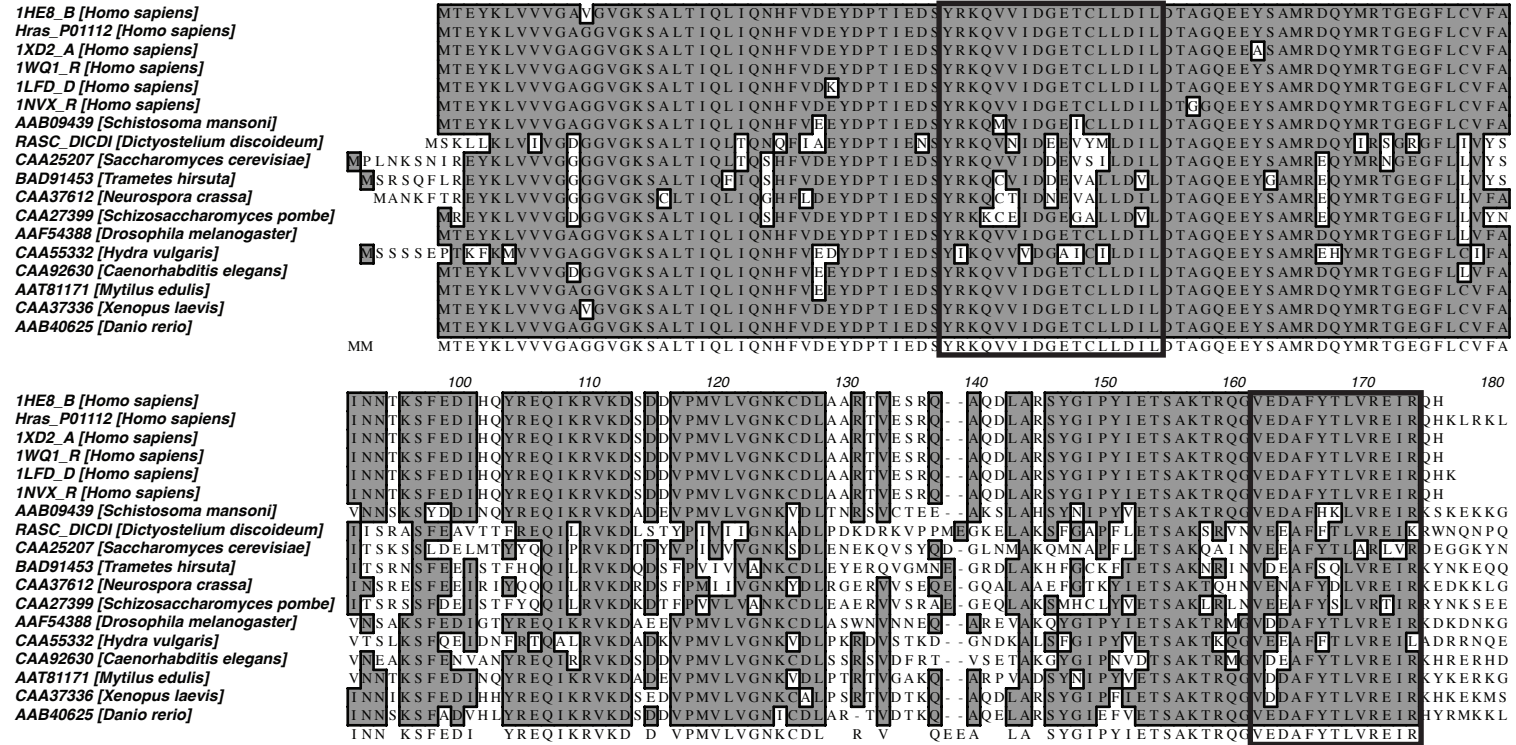

B

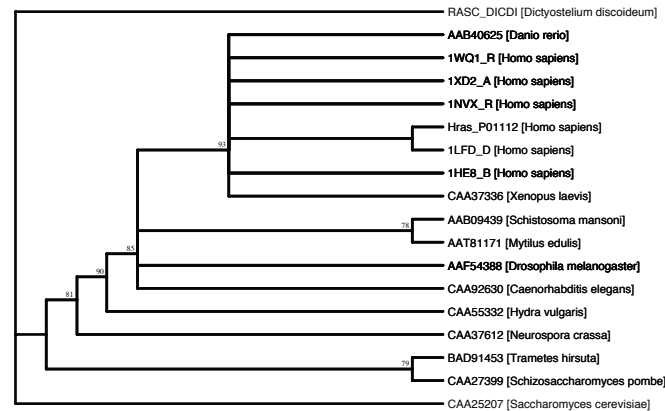

C

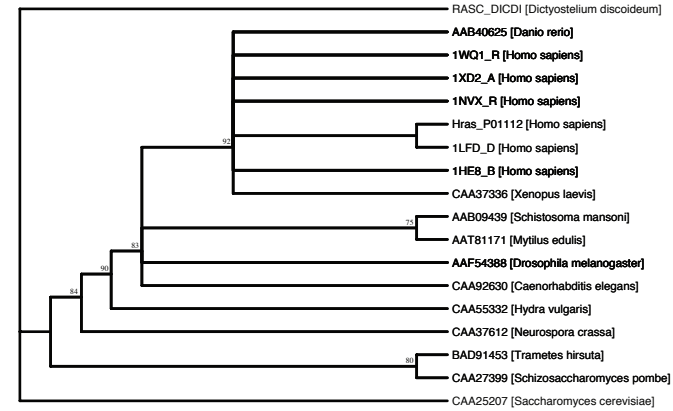

Supplement: supp [file elife_poa_e08905_Figure_3_figure_supplement_1.pdf › elife_poa_e08905_Figure_3_figure_supplement_1.pdf]

**A**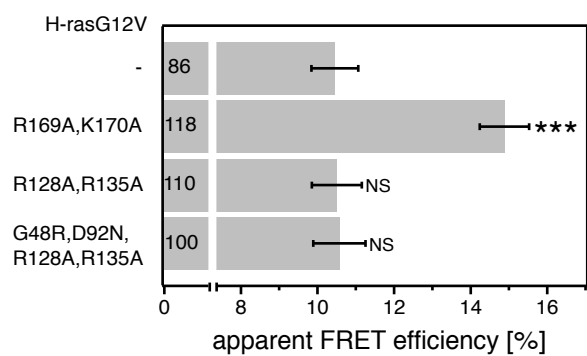**B**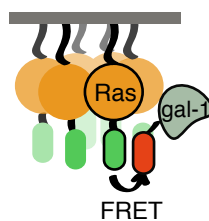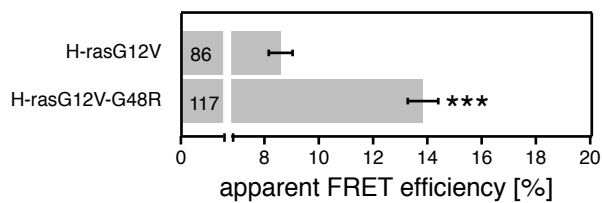**C**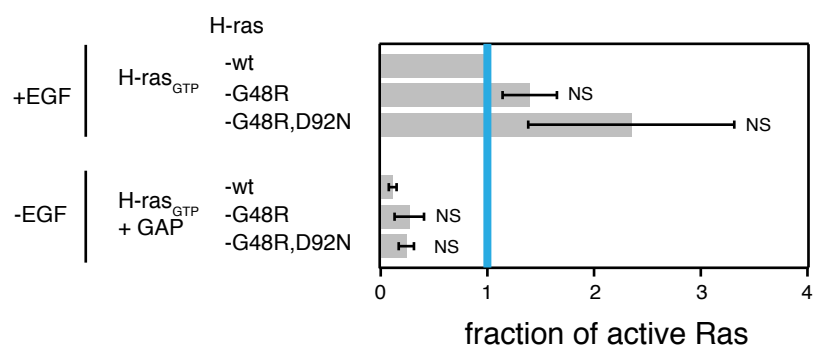

Supplement: supp [file elife_poa_e08905_Figure_4_figure_supplement_1.pdf › elife_poa_e08905_Figure_4_figure_supplement_1.pdf]

**A**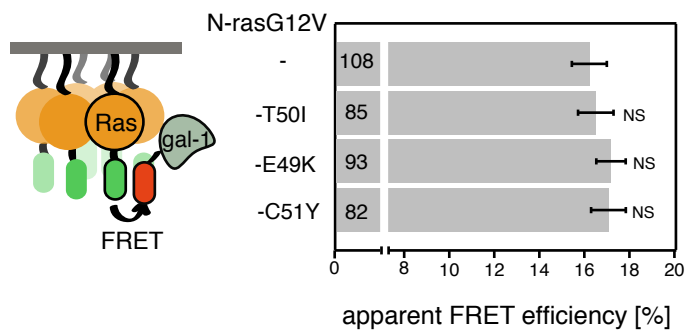**B**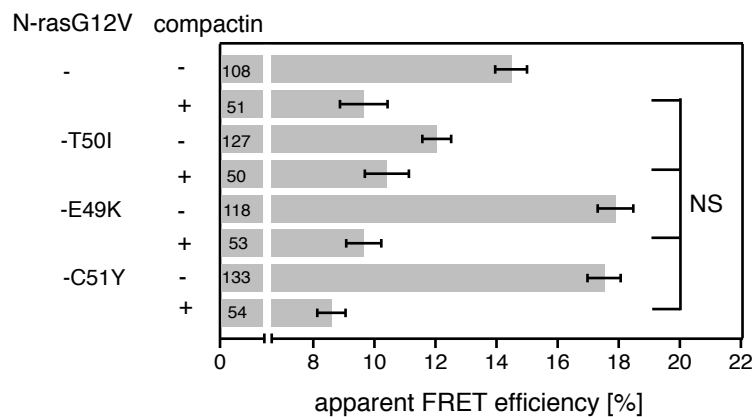**C**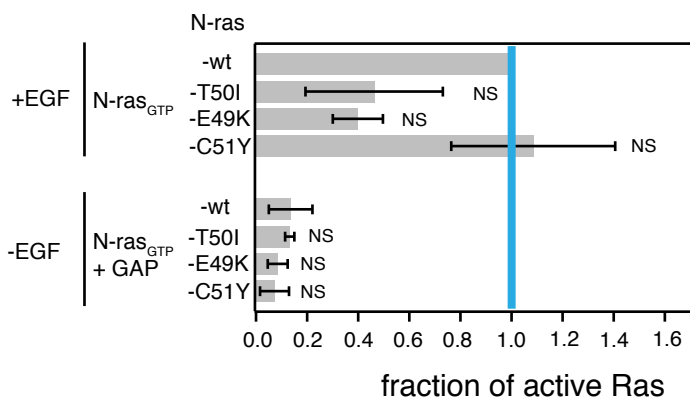**D**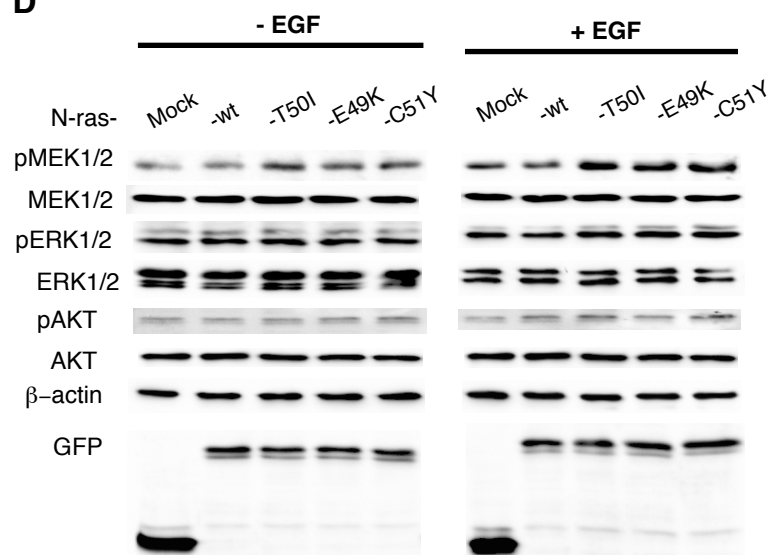**E**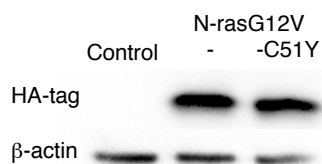

Supplement: supp [file elife_poa_e08905_Figure_5_figure_supplement_1.pdf › elife_poa_e08905_Figure_5_figure_supplement_1.pdf]

**A**

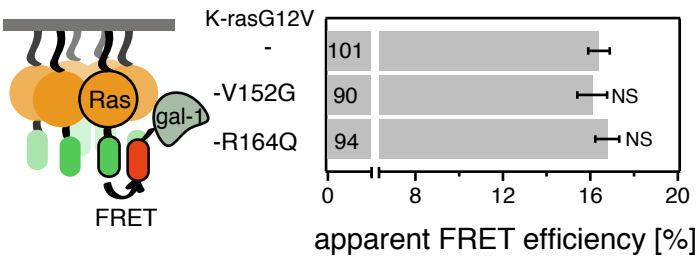

**B**

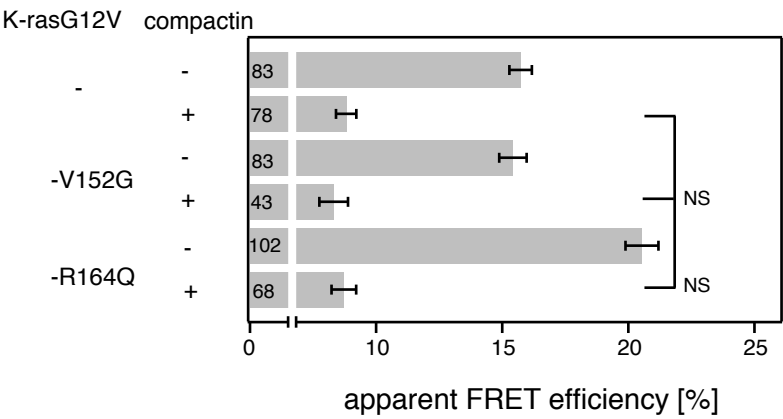

**C**

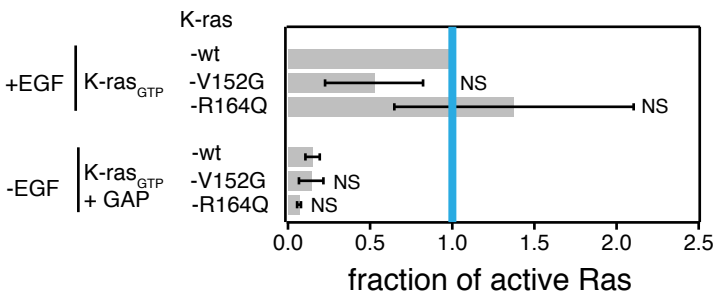

**D**

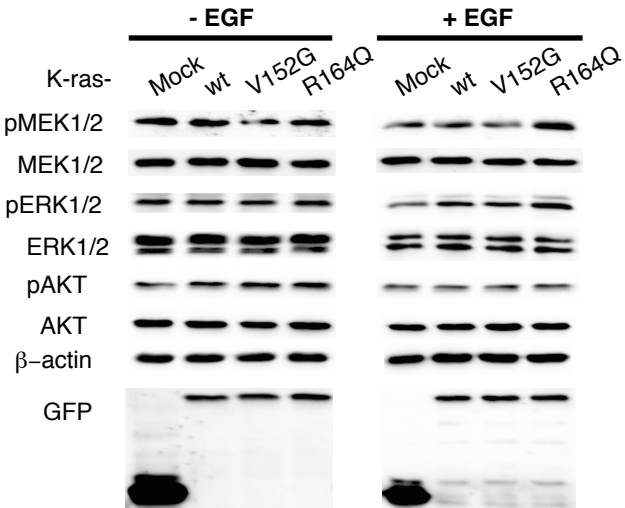

**E**

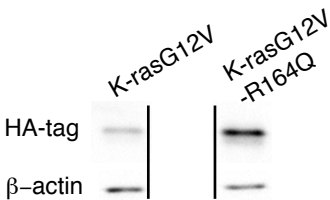

Supplement: supp [file elife_poa_e08905_Figure_6_figure_supplement_1.pdf › elife_poa_e08905_Figure_6_figure_supplement_1.pdf]
